# Supplementary material for: A Comprehensive Description of the Anatomy and Histochemistry of Psychotria capillacea (Müll. Arg.) Standl. and an Investigation into Its Anti-Inflammatory Effects in Mice and Role in Scopolamine-Induced Memory Impairment
Source: MDPI journal article supplement (doi:10.3390/ph17050564), 2024-04-28
Supplement: s1 [file s1]

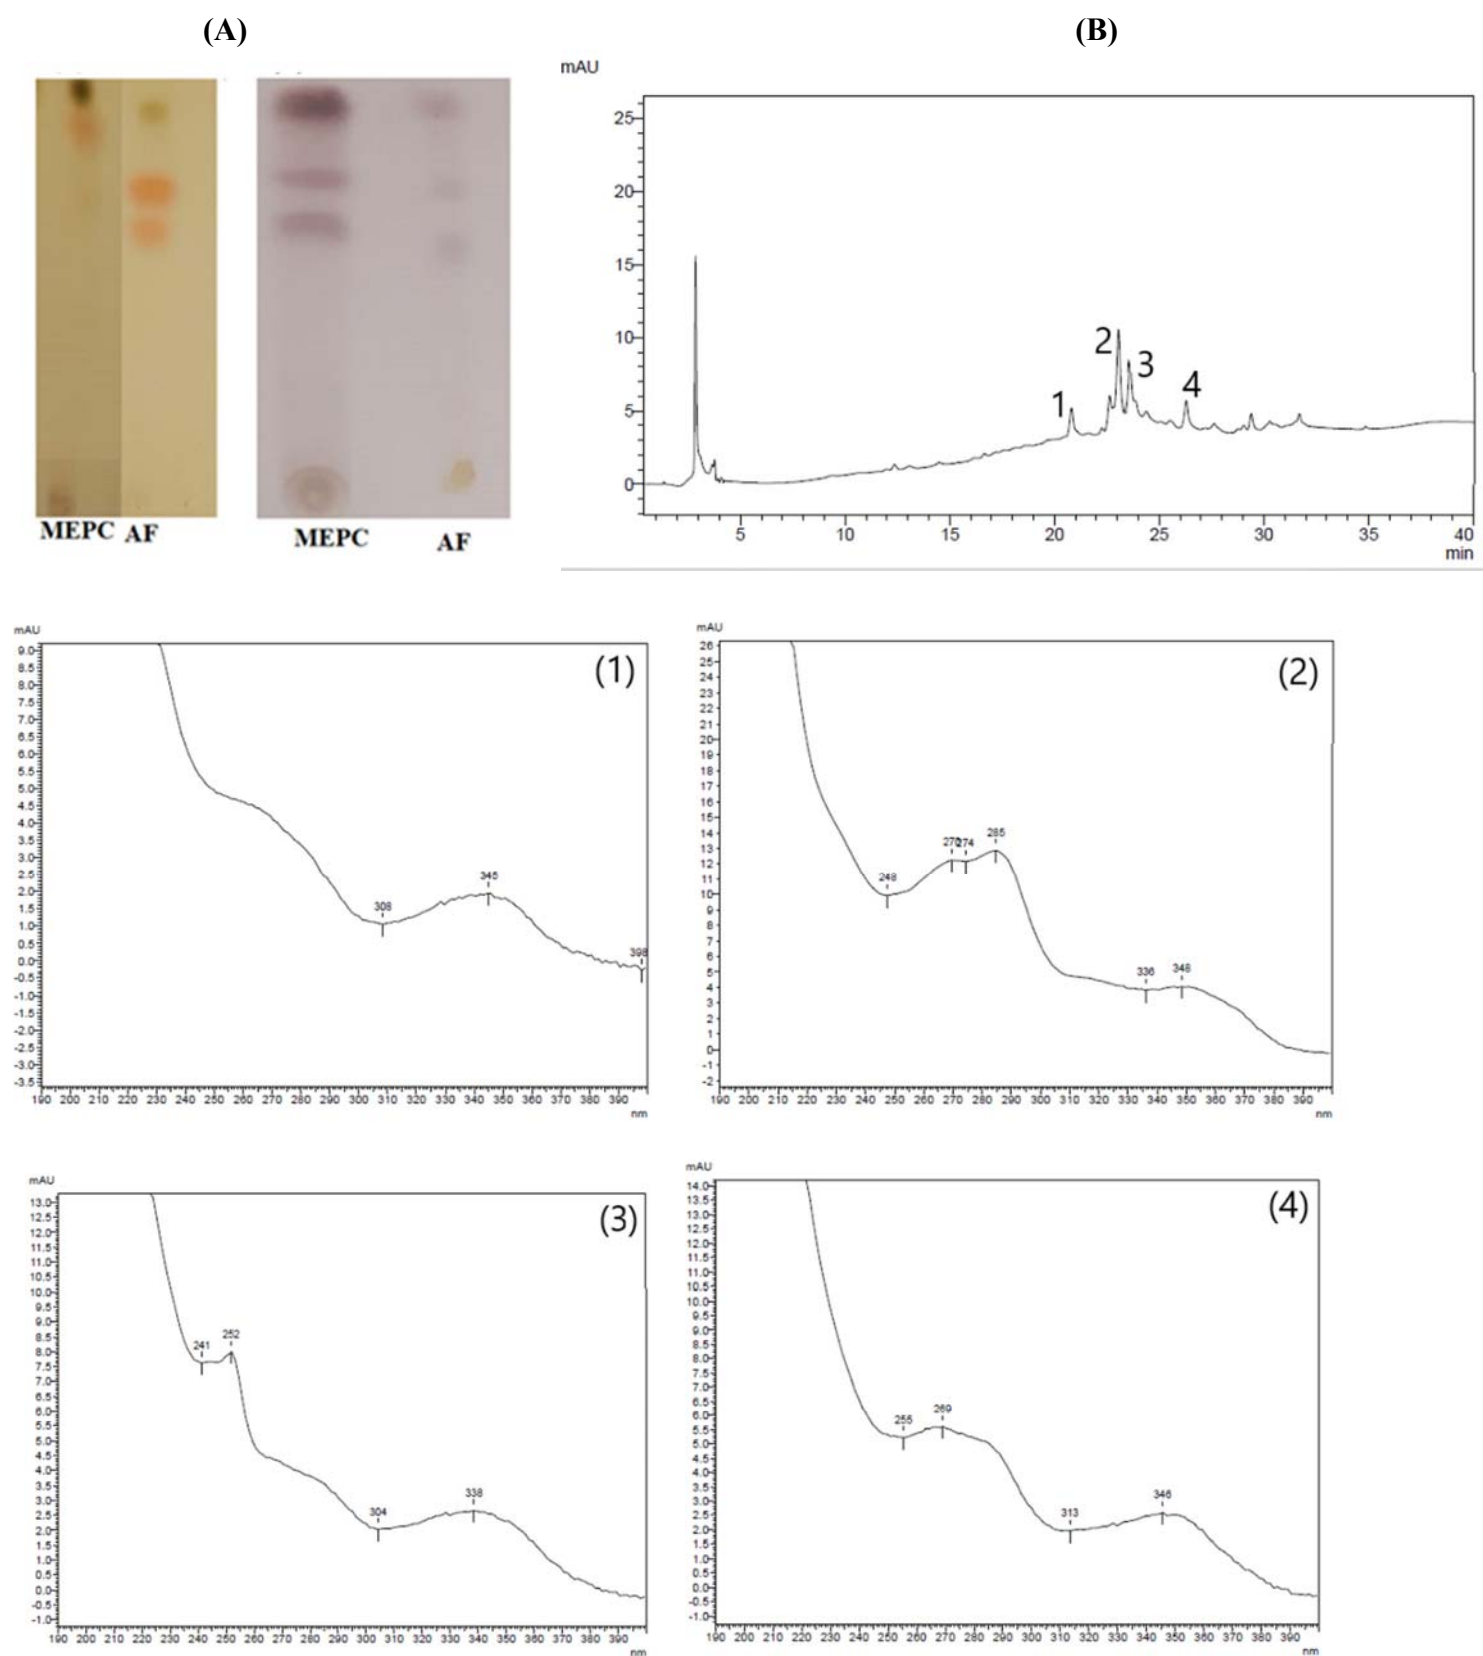

**Figure S1.** The analyses by TLC plates (A) and (B) LC-DAD (UV/DAD;  $\lambda = 245$  nm) from *P. capillacea*.

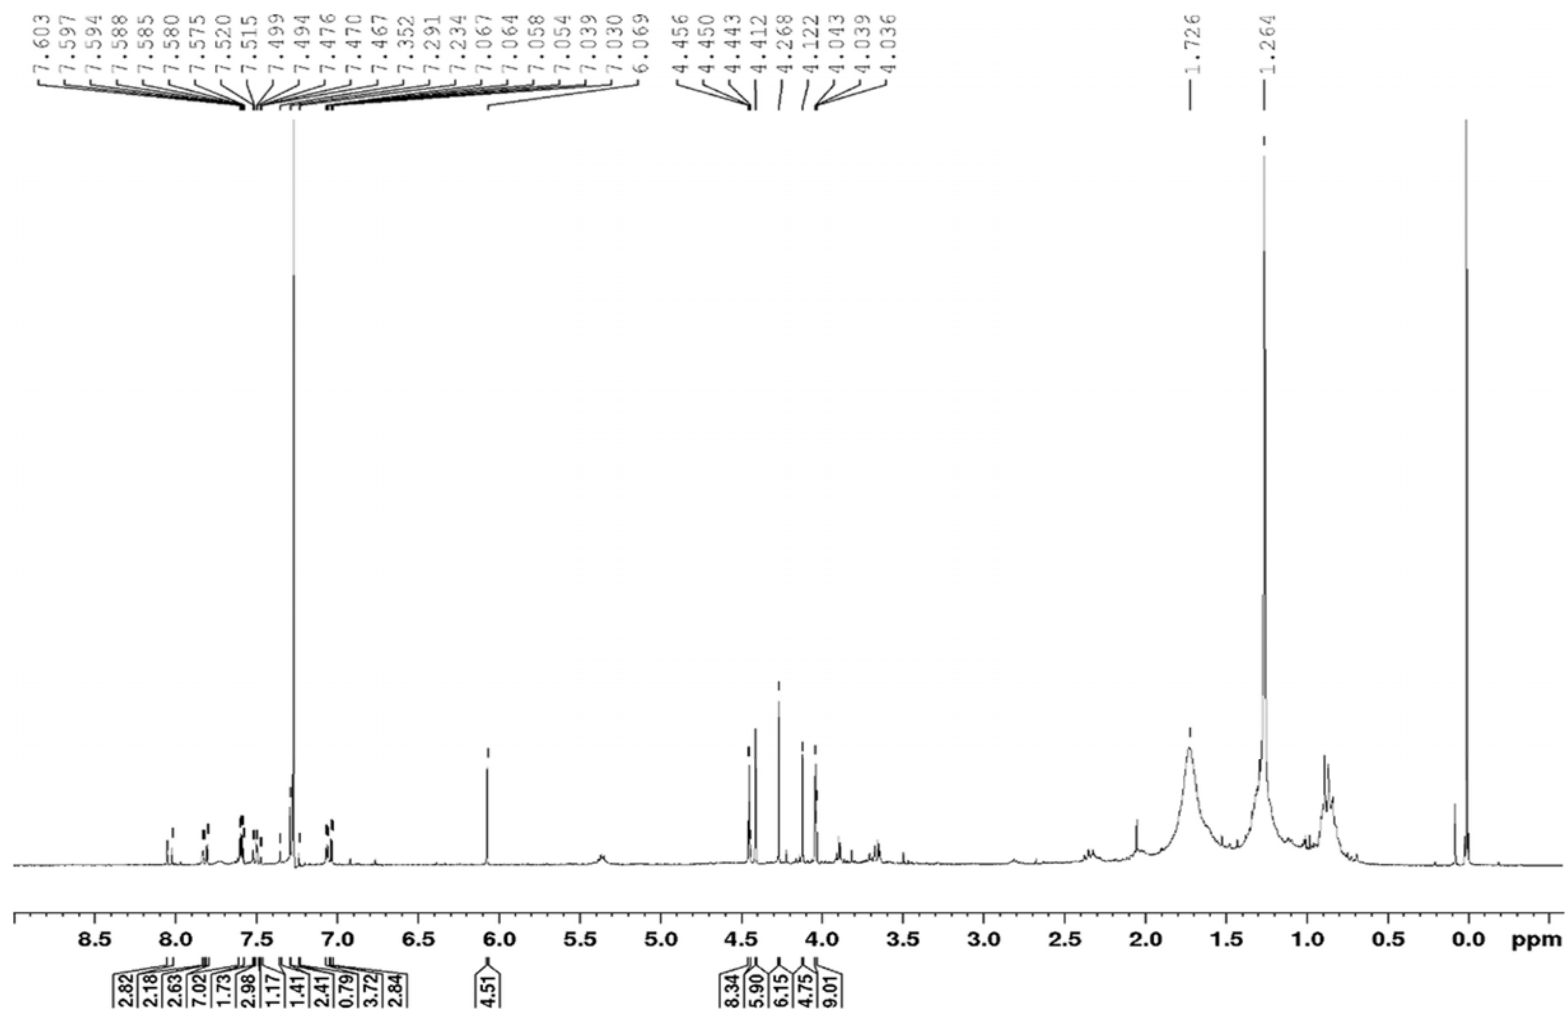

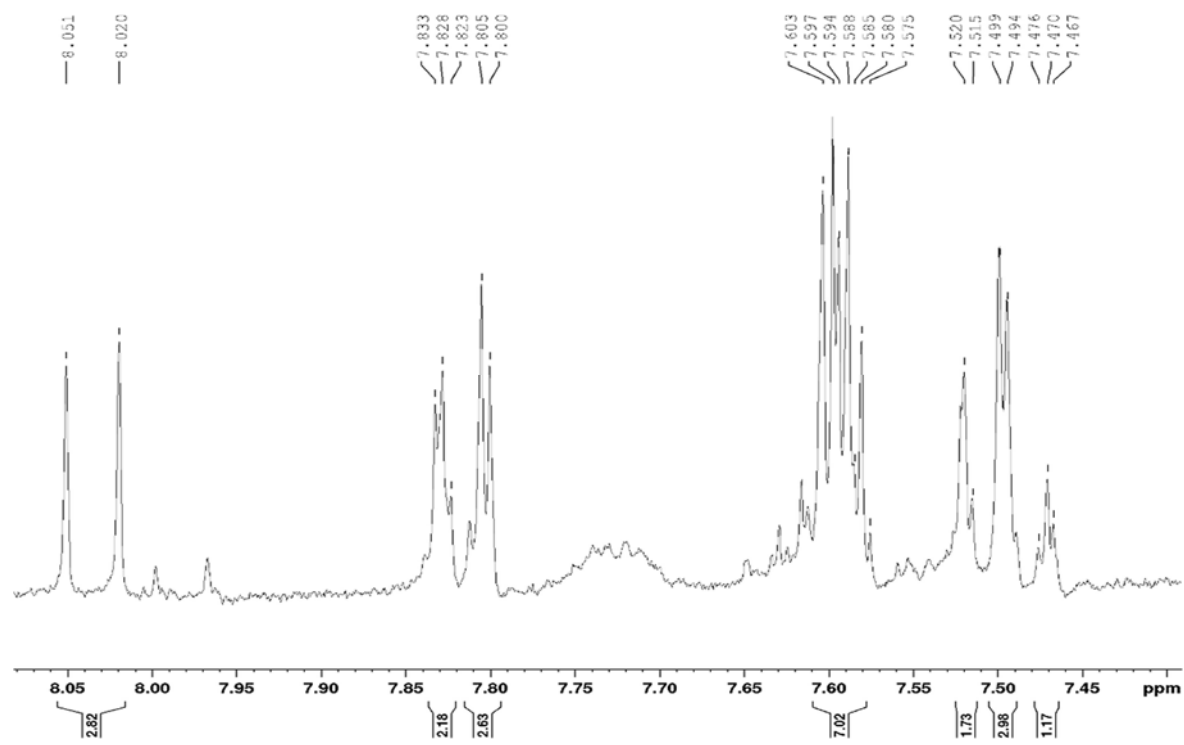

Figure S2.  $^1\text{H}$  NMR spectrum ( $\text{CDCl}_3\text{-d}_6$ , 300 MHz) for the alkaloidal fraction (AF) obtained from *P. capillacea*.
